# Supplementary material for: Pharmacological Inhibition of WIP1 Sensitizes Acute Myeloid Leukemia Cells to the MDM2 Inhibitor Nutlin-3a
Source: PubMed Central journal article supplement (PMC8067413; doi:10.3390/biomedicines9040388), 2021-04-06
Supplement: biomedicines-09-00388-s001.pdf [file biomedicines-09-00388-s001.pdf]

Supplementary Material

Supplementary Tables

Table S1. Combination index analysis of TP53-wt AML cells

| TP53-wt<br>AML cell<br>lines | Drug<br>concentration [ $\mu$ M] |     | 24h   |      |      | 48h  |      |      | 72h  |      |      |
|------------------------------|----------------------------------|-----|-------|------|------|------|------|------|------|------|------|
|                              |                                  |     | WIP1i |      |      |      |      |      |      |      |      |
|                              |                                  |     | 5     | 10   | 20   | 5    | 10   | 20   | 5    | 10   | 20   |
| MOLM-13                      | Nut-3a                           | 0.5 | 0.24  | 0.25 | 0.33 | 0.79 | 0.83 | 0.85 | 0.84 | 0.85 | 0.88 |
|                              |                                  | 1   | 0.35  | 0.47 | 0.60 | 0.90 | 0.92 | 0.93 | 0.93 | 0.94 | 0.95 |
|                              |                                  | 2.5 | 0.72  | 0.70 | 0.77 | 0.95 | 0.96 | 0.97 | 0.96 | 0.98 | 0.98 |
|                              |                                  | 5   | 0.81  | 0.79 | 0.84 | 0.99 | 0.99 | 0.99 | 0.98 | 0.98 | 0.98 |
| MV-4-11                      |                                  | 0.5 | 0.23  | 0.33 | 0.29 | 0.22 | 0.18 | 0.16 | 0.44 | 0.54 | 0.60 |
|                              |                                  | 1   | 0.24  | 0.26 | 0.29 | 0.25 | 0.24 | 0.19 | 0.70 | 0.80 | 0.88 |
|                              |                                  | 2.5 | 0.41  | 0.51 | 0.48 | 0.39 | 0.47 | 0.30 | 1.28 | 1.36 | 1.50 |
|                              |                                  | 5   | 0.29  | 0.63 | 0.67 | 0.45 | 0.45 | 0.45 | 2.11 | 2.17 | 2.30 |
| OCI-AML3                     |                                  | 0.5 | 0.06  | 0.08 | 0.33 | 0.30 | 0.25 | 0.66 | 0.87 | 0.77 | 4.88 |
|                              |                                  | 1   | 0.90  | 0.09 | 0.11 | 0.26 | 0.25 | 0.28 | 0.91 | 1.90 | 3.21 |
|                              |                                  | 2.5 | 0.11  | 0.15 | 0.09 | 0.38 | 0.35 | 0.31 | 0.86 | 1.25 | 0.92 |
|                              |                                  | 5   | 0.10  | 0.08 | 0.04 | 0.34 | 0.34 | 0.31 | 0.79 | 0.98 | 0.89 |

Table S2. Characteristics of primary AML samples

| Sample ID | Specimen Type | Karyotype                                  | FLT3 | NPM1 | TP53 |
|-----------|---------------|--------------------------------------------|------|------|------|
| #1        | PB            | NA                                         | ITD  | mut  | wt   |
| #2        | BM            | 48, XY, +6, +15 [30]                       | wt   | wt   | wt   |
| #3        | PB            | 46 XY [20]                                 | ITD  | mut  | wt   |
| #4        | BM            | NA                                         | wt   | wt   | wt   |
| #5        | BM            | 46 XX [15]                                 | wt   | wt   | wt   |
| #6        | BM            | 46, XY [20]                                | ITD  | mut  | wt   |
| #7        | BM            | 46, XY [20]                                | ITD  | mut  | wt   |
| #8        | BM            | 46, XY, del(2)(p21), t(5;11)(q23;q24) [20] | TKD  | wt   | wt   |
| #9        | BM            | 46, XX [15]                                | ITD  | mut  | wt   |
| #10       | BM            | Complex                                    | ITD  | wt   | wt   |
| #11       | BM            | Complex                                    | wt   | wt   | mut  |
| #12       | PB            | Complex                                    | wt   | wt   | mut  |
| #13       | BM            | NA                                         | wt   | wt   | mut  |

BM: bone marrow; ITD: internal tandem duplication; mut: mutated; NA: not available; PB: peripheral blood; TKD: mutated in the tyrosine kinase domain; wt: wildtype

**Table S3.** Top 20 upregulated (red) and downregulated (blue) genes in MV-4-11 cells treated with Nut-3a+WIP1i vs. control

| Gene            | Description                                                       | Chromosome | Fold change | p value |
|-----------------|-------------------------------------------------------------------|------------|-------------|---------|
| <i>MDM2</i>     | MDM2 Proto-Oncogene, E3 Ubiquitin Protein Ligase                  | chr12      | 17.03       | 0.003   |
| <i>TP53INP1</i> | Tumor Protein P53 Inducible Nuclear Protein 1                     | chr8       | 5.70        | 0.008   |
| <i>XPC</i>      | Xeroderma Pigmentosum, Complementation Group C                    | chr3       | 4.86        | 0.019   |
| <i>ZMAT3</i>    | Zinc Finger, Matrin-Type 3                                        | chr3       | 4.66        | 0.001   |
| <i>CDKN1A</i>   | Cyclin-Dependent Kinase Inhibitor 1A (P21, Cip1)                  | chr6       | 3.68        | 0.038   |
| <i>TOM1L1</i>   | Target Of Myb1 Like 1 Membrane Trafficking Protein                | chr17      | 2.87        | 0.014   |
| <i>DYRK1B</i>   | Dual Specificity Tyrosine-(Y)-Phosphorylation Regulated Kinase 1B | chr19      | 2.69        | 0.036   |
| <i>MEI4</i>     | Meiotic Double-Stranded Break Formation Protein 4                 | chr6       | 2.53        | 0.001   |
| <i>SUMO4</i>    | Small Ubiquitin-Like Modifier 4                                   | chr6       | 2.43        | 0.045   |
| <i>B3GAT1</i>   | Beta-1,3-Glucuronyltransferase 1                                  | chr11      | 2.41        | 0.024   |
| <i>COL2A1</i>   | Collagen, Type II, Alpha 1                                        | chr12      | 2.35        | 0.003   |
| <i>IRAK1BP1</i> | Interleukin 1 Receptor Associated Kinase 1 Binding Protein 1      | chr6       | 2.35        | 0.015   |
| <i>ALDH1A2</i>  | Aldehyde Dehydrogenase 1 Family, Member A2                        | chr15      | 2.20        | 0.025   |
| <i>ITGAD</i>    | Integrin Alpha D                                                  | chr16      | 2.13        | 0.032   |
| <i>HLA-A</i>    | Major Histocompatibility Complex, Class I, A                      | chr6       | 2.11        | 0.048   |
| <i>PROM1</i>    | Prominin 1                                                        | chr4       | 2.10        | 0.015   |
| <i>SIM1</i>     | Single-Minded Family Bhlh Transcription Factor 1                  | chr6       | 2.08        | 0.014   |
| <i>NAPSA</i>    | Napsin A Aspartic Peptidase                                       | chr19      | 2.07        | 0.011   |
| <i>CYSRT1</i>   | Cysteine-Rich Tail Protein 1                                      | chr9       | 2.07        | 0.039   |
| <i>NBR1</i>     | Neighbor Of BRCA1 Gene 1                                          | chr17      | 2.03        | 0.020   |
| <i>HSPA14</i>   | Heat Shock 70kda Protein 14                                       | chr10      | 0.28        | 0.002   |
| <i>UNG</i>      | Uracil DNA Glycosylase                                            | chr12      | 0.30        | 0.039   |
| <i>RGSL1</i>    | Regulator Of G-Protein Signaling Like 1                           | chr1       | 0.35        | 0.038   |
| <i>FRMD3</i>    | FERM Domain Containing 3                                          | chr9       | 0.35        | 0.002   |
| <i>ABHD17C</i>  | Abhydrolase Domain Containing 17C                                 | chr15      | 0.35        | 0.018   |
| <i>TIMELESS</i> | Timeless Circadian Clock                                          | chr12      | 0.36        | 0.042   |
| <i>BCAT1</i>    | Branched Chain Amino-Acid Transaminase 1, Cytosolic               | chr12      | 0.36        | 0.014   |
| <i>ARPC1A</i>   | Actin Related Protein 2/3 Complex Subunit 1A                      | chr7       | 0.36        | 0.003   |
| <i>PSMG4</i>    | Proteasome (Prosome, Macropain) Assembly Chaperone 4              | chr6       | 0.37        | 0.021   |
| <i>RRM2</i>     | Ribonucleotide Reductase M2                                       | chr2       | 0.37        | 0.049   |
| <i>HELLS</i>    | Helicase, Lymphoid-Specific                                       | chr10      | 0.39        | 0.027   |
| <i>LBR</i>      | Lamin B Receptor                                                  | chr1       | 0.40        | 0.031   |
| <i>GSTA2</i>    | Glutathione S-Transferase Alpha 2                                 | chr6       | 0.40        | 0.025   |
| <i>SLC27A2</i>  | Solute Carrier Family 27 (Fatty Acid Transporter), Member 2       | chr15      | 0.41        | 0.018   |

|                |                                                              |       |      |       |
|----------------|--------------------------------------------------------------|-------|------|-------|
| <i>ICAM3</i>   | Intercellular Adhesion Molecule 3                            | chr19 | 0.42 | 0.006 |
| <i>DCUN1D5</i> | DCN1, Defective In Cullin Neddylation 1, Domain Containing 5 | chr11 | 0.42 | 0.016 |
| <i>SETD4</i>   | SET Domain Containing 4                                      | chr21 | 0.42 | 0.043 |
| <i>SETD7</i>   | SET Domain Containing (Lysine Methyltransferase) 7           | chr4  | 0.43 | 0.008 |
| <i>TREML2</i>  | Triggering Receptor Expressed On Myeloid Cells-Like 2        | chr6  | 0.43 | 0.032 |

**Table S4.** Top 20 upregulated (red) and downregulated (blue) genes in NOMO-1 cells treated with Nut3a+WIP1i vs. control

| Gene           | Description                                                       | Chromosome | Fold change | p value |
|----------------|-------------------------------------------------------------------|------------|-------------|---------|
| <i>FABP4</i>   | Fatty Acid Binding Protein 4, Adipocyte                           | chr8       | 45.25       | 0.003   |
| <i>CD36</i>    | Cd36 Molecule (Thrombospondin Receptor)                           | chr7       | 36.76       | 0.016   |
| <i>LACC1</i>   | Laccase (Multicopper Oxidoreductase) Domain 1                     | chr13      | 20.39       | 0.015   |
| <i>SLC39A8</i> | Solute Carrier Family 39 (Zinc Transporter), Member 8             | chr4       | 14.83       | 0.033   |
| <i>TNFRSF9</i> | Tumor Necrosis Factor Receptor Superfamily, Member 9              | chr1       | 8.28        | 0.003   |
| <i>ME1</i>     | Malic Enzyme 1, NADP(+)-Dependent, Cytosolic                      | chr6       | 5.98        | 0.015   |
| <i>PLIN2</i>   | Perilipin 2                                                       | chr9       | 5.98        | 0.019   |
| <i>CCL18</i>   | Chemokine (C-C Motif) Ligand 18                                   | chr17      | 5.24        | 0.024   |
| <i>IER3</i>    | Immediate Early Response 3                                        | chr6       | 5.21        | 0.038   |
| <i>G0S2</i>    | G0/G1 Switch 2                                                    | chr1       | 4.89        | 0.006   |
| <i>GPR84</i>   | G Protein-Coupled Receptor 84                                     | chr12      | 4.50        | 0.005   |
| <i>LPAR6</i>   | Lysophosphatidic Acid Receptor 6                                  | chr13      | 4.23        | 0.012   |
| <i>ZFP36L1</i> | Zfp36 Ring Finger Protein-Like 1                                  | chr14      | 3.97        | 0.020   |
| <i>IL7R</i>    | Interleukin 7 Receptor                                            | chr5       | 3.94        | 0.042   |
| <i>PHLDA1</i>  | Pleckstrin Homology-Like Domain, Family A, Member 1               | chr12      | 3.92        | 0.007   |
| <i>SOD2</i>    | Superoxide Dismutase 2, Mitochondrial                             | chr6       | 3.92        | 0.042   |
| <i>PDK4</i>    | Pyruvate Dehydrogenase Kinase, Isozyme 4                          | chr7       | 3.86        | 0.044   |
| <i>ALDH1L2</i> | Aldehyde Dehydrogenase 1 Family, Member L2                        | chr12      | 3.81        | 0.008   |
| <i>LDHAL6B</i> | Lactate Dehydrogenase A-Like 6b                                   | chr15      | 3.34        | 0.022   |
| <i>TRPV5</i>   | Transient Receptor Potential Cation Channel Subfamily V, Member 5 | chr7       | 3.10        | 0.033   |
| <i>STK25</i>   | Serine/Threonine Kinase 25                                        | chr2       | 0.37        | 0.022   |
| <i>NEIL3</i>   | Nei-Like Dna Glycosylase 3                                        | chr4       | 0.37        | 0.041   |
| <i>CDCA5</i>   | Cell Division Cycle Associated 5                                  | chr11      | 0.37        | 0.039   |
| <i>TMEM55B</i> | Transmembrane Protein 55b                                         | chr14      | 0.37        | ≤0.001  |
| <i>DUS2</i>    | Dihydrouridine Synthase 2                                         | chr16      | 0.37        | 0.010   |
| <i>PYCR1</i>   | Pyrroline-5-Carboxylate Reductase 1                               | chr17      | 0.37        | 0.034   |
| <i>LASP1</i>   | Lim And Sh3 Protein 1                                             | chr17      | 0.38        | 0.042   |
| <i>PAK1</i>    | P21 Protein (Cdc42/Rac)-Activated Kinase 1                        | chr11      | 0.38        | 0.047   |
| <i>DEFB1</i>   | Defensin, Beta 1                                                  | chr8       | 0.38        | 0.023   |
| <i>PPP2R5D</i> | Protein Phosphatase 2, Regulatory Subunit B, Delta                | chr6       | 0.38        | 0.025   |
| <i>INPP5D</i>  | Inositol Polyphosphate-5-Phosphatase D                            | chr12      | 0.38        | 0.020   |

|               |                                                         |       |      |       |
|---------------|---------------------------------------------------------|-------|------|-------|
| <i>ZNF692</i> | Zinc Finger Protein 692                                 | chr1  | 0.38 | 0.040 |
| <i>HHIP</i>   | Hedgehog Interacting Protein                            | chr4  | 0.38 | 0.029 |
| <i>DTYMK</i>  | Deoxythymidylate Kinase                                 | chr2  | 0.38 | 0.009 |
| <i>UBXN11</i> | Ubx Domain Protein 11                                   | chr1  | 0.38 | 0.050 |
| <i>PBX2</i>   | Pre-B-Cell Leukemia Homeobox 2                          | chr6  | 0.38 | 0.006 |
| <i>CDCA2</i>  | Cell Division Cycle Associated 2                        | chr8  | 0.38 | 0.039 |
| <i>MAP4K2</i> | Mitogen-Activated Protein Kinase Kinase Kinase Kinase 2 | chr11 | 0.38 | 0.016 |
| <i>ANXA8</i>  | Annexin A8                                              | chr10 | 0.39 | 0.019 |
| <i>ANAPC4</i> | Anaphase Promoting Complex Subunit 4                    | chr4  | 0.39 | 0.017 |

**Table S5.** Top 20 upregulated (red) and downregulated (blue) genes in MV-4-11 cells treated with Nut3a+WIP1i *vs.* WIP1i

| Gene            | Description                                                       | Chromosome | Fold change | p value |
|-----------------|-------------------------------------------------------------------|------------|-------------|---------|
| <i>MDM2</i>     | MDM2 Proto-Oncogene, E3 Ubiquitin Protein Ligase                  | chr12      | 17.03       | 0.002   |
| <i>TP53INP1</i> | Tumor Protein P53 Inducible Nuclear Protein 1                     | chr8       | 5.70        | 0.008   |
| <i>XPC</i>      | Xeroderma Pigmentosum, Complementation Group C                    | chr3       | 4.86        | 0.019   |
| <i>ZMAT3</i>    | Zinc Finger, Matrin-Type 3                                        | chr3       | 4.66        | ≤0.001  |
| <i>CDKN1A</i>   | Cyclin-Dependent Kinase Inhibitor 1A (P21, Cip1)                  | chr6       | 3.68        | 0.038   |
| <i>TOM1L1</i>   | Target Of Myb1 Like 1 Membrane Trafficking Protein                | chr17      | 2.87        | 0.013   |
| <i>DYRK1B</i>   | Dual Specificity Tyrosine-(Y)-Phosphorylation Regulated Kinase 1B | chr19      | 2.69        | 0.036   |
| <i>MEI4</i>     | Meiotic Double-Stranded Break Formation Protein 4                 | chr6       | 2.53        | ≤0.001  |
| <i>SUMO4</i>    | Small Ubiquitin-Like Modifier 4                                   | chr6       | 2.43        | 0.045   |
| <i>B3GAT1</i>   | Beta-1,3-Glucuronyltransferase 1                                  | chr11      | 2.41        | 0.024   |
| <i>COL2A1</i>   | Collagen, Type II, Alpha 1                                        | chr12      | 2.35        | 0.003   |
| <i>IRAK1BP1</i> | Interleukin 1 Receptor Associated Kinase 1 Binding Protein 1      | chr6       | 2.35        | 0.015   |
| <i>ALDH1A2</i>  | Aldehyde Dehydrogenase 1 Family, Member A2                        | chr15      | 2.20        | 0.025   |
| <i>ITGAD</i>    | Integrin Alpha D                                                  | chr16      | 2.13        | 0.031   |
| <i>HLA-A</i>    | Major Histocompatibility Complex, Class I, A                      | chr6       | 2.11        | 0.047   |
| <i>PROM1</i>    | Prominin 1                                                        | chr4       | 2.10        | 0.014   |
| <i>SIM1</i>     | Single-Minded Family Bhlh Transcription Factor 1                  | chr6       | 2.08        | 0.014   |
| <i>NAPSA</i>    | Napsin A Aspartic Peptidase                                       | chr19      | 2.07        | 0.010   |
| <i>CYSRT1</i>   | Cysteine-Rich Tail Protein 1                                      | chr9       | 2.07        | 0.039   |
| <i>NBR1</i>     | Neighbor Of BRCA1 Gene 1                                          | chr17      | 2.03        | 0.019   |
| <i>HSPA14</i>   | Heat Shock 70kda Protein 14                                       | chr10      | 0.28        | 0.001   |
| <i>UNG</i>      | Uracil DNA Glycosylase                                            | chr12      | 0.30        | 0.038   |
| <i>RGSL1</i>    | Regulator Of G-Protein Signaling Like 1                           | chr1       | 0.35        | 0.038   |
| <i>FRMD3</i>    | FERM Domain Containing 3                                          | chr9       | 0.35        | 0.001   |
| <i>ABHD17C</i>  | Abhydrolase Domain Containing 17C                                 | chr15      | 0.35        | 0.018   |
| <i>TIMELESS</i> | Timeless Circadian Clock                                          | chr12      | 0.36        | 0.041   |
| <i>BCAT1</i>    | Branched Chain Amino-Acid Transaminase 1, Cytosolic               | chr12      | 0.36        | 0.014   |
| <i>ARPC1A</i>   | Actin Related Protein 2/3 Complex Subunit 1A                      | chr7       | 0.36        | 0.003   |
| <i>PSMG4</i>    | Proteasome (Prosome, Macropain) Assembly Chaperone 4              | chr6       | 0.37        | 0.020   |
| <i>RRM2</i>     | Ribonucleotide Reductase M2                                       | chr2       | 0.37        | 0.048   |
| <i>HELLS</i>    | Helicase, Lymphoid-Specific                                       | chr10      | 0.39        | 0.026   |

|                |                                                              |       |      |       |
|----------------|--------------------------------------------------------------|-------|------|-------|
| <i>LBR</i>     | Lamin B Receptor                                             | chr1  | 0.40 | 0.030 |
| <i>GSTA2</i>   | Glutathione S-Transferase Alpha 2                            | chr6  | 0.40 | 0.025 |
| <i>SLC27A2</i> | Solute Carrier Family 27 (Fatty Acid Transporter), Member 2  | chr15 | 0.41 | 0.017 |
| <i>ICAM3</i>   | Intercellular Adhesion Molecule 3                            | chr19 | 0.42 | 0.006 |
| <i>DCUN1D5</i> | DCN1, Defective In Cullin Neddylation 1, Domain Containing 5 | chr11 | 0.42 | 0.016 |
| <i>SETD4</i>   | SET Domain Containing 4                                      | chr21 | 0.42 | 0.043 |
| <i>SETD7</i>   | SET Domain Containing (Lysine Methyltransferase) 7           | chr4  | 0.43 | 0.007 |
| <i>TREML2</i>  | Triggering Receptor Expressed On Myeloid Cells-Like 2        | chr6  | 0.43 | 0.031 |

**Table S6.** Top 20 upregulated (red) and downregulated (blue) genes in NOMO-1 cells treated with Nut3a+WIP1i *vs.* WIP1i

| Gene            | Description                                                                                      | Chromosome | Fold change | p value |
|-----------------|--------------------------------------------------------------------------------------------------|------------|-------------|---------|
| <i>CCL3</i>     | Chemokine (C-C Motif) Ligand 3                                                                   | chr17      | 13.93       | 0.032   |
| <i>LACC1</i>    | Laccase (Multicopper Oxidoreductase) Domain Containing 1                                         | chr13      | 11.00       | 0.024   |
| <i>TNFRSF9</i>  | Tumor Necrosis Factor Receptor Superfamily, Member 9                                             | chr1       | 8.40        | 0.002   |
| <i>GPR84</i>    | G Protein-Coupled Receptor 84                                                                    | chr12      | 8.34        | 0.015   |
| <i>G0S2</i>     | G0/G1 Switch 2                                                                                   | chr1       | 5.35        | 0.003   |
| <i>RGL1</i>     | Ral Guanine Nucleotide Dissociation Stimulator-Like 1                                            | chr1       | 5.31        | 0.026   |
| <i>SOD2</i>     | Superoxide Dismutase 2, Mitochondrial                                                            | chr6       | 4.29        | 0.033   |
| <i>RASGRP1</i>  | Ras Guanyl Releasing Protein 1                                                                   | chr15      | 3.97        | 0.038   |
| <i>ZFP36L1</i>  | Zfp36 Ring Finger Protein-Like 1                                                                 | chr14      | 3.61        | 0.003   |
| <i>CALCOCO1</i> | Calcium Binding And Coiled-Coil Domain 1                                                         | chr12      | 3.32        | 0.003   |
| <i>ARL4C</i>    | Adp-Ribosylation Factor Like Gtpase 4c                                                           | chr2       | 3.14        | 0.043   |
| <i>ME1</i>      | Malic Enzyme 1, Nadp(+)-Dependent, Cytosolic                                                     | chr6       | 3.01        | 0.036   |
| <i>DUSP16</i>   | Dual Specificity Phosphatase 16                                                                  | chr12      | 2.99        | 0.014   |
| <i>ADGRE1</i>   | Adhesion G Protein-Coupled Receptor E1                                                           | chr19      | 2.99        | 0.022   |
| <i>GPR132</i>   | G Protein-Coupled Receptor 132                                                                   | chr14      | 2.71        | 0.029   |
| <i>PLA2G7</i>   | Phospholipase A2, Group Vii                                                                      | chr6       | 2.66        | 0.028   |
| <i>TNFSF15</i>  | Tumor Necrosis Factor (Ligand) Superfamily, Member 15                                            | chr9       | 2.64        | 0.021   |
| <i>FABP6</i>    | Fatty Acid Binding Protein 6, Ileal                                                              | chr5       | 2.64        | 0.009   |
| <i>NFAT5</i>    | Nuclear Factor Of Activated T-Cells 5, Tonicity-Responsive                                       | chr16      | 2.60        | 0.049   |
| <i>COX7A1</i>   | Cytochrome C Oxidase Subunit Vii Polypeptide 1                                                   | chr19      | 2.60        | 0.044   |
| <i>ADGRA3</i>   | Adhesion G Protein-Coupled Receptor A3                                                           | chr4       | 0.17        | 0.049   |
| <i>KCNQ5</i>    | Potassium Channel, Voltage Gated Kqt-Like Subfamily Q, Member 5                                  | chr6       | 0.17        | 0.039   |
| <i>MARC1</i>    | Mitochondrial Amidoxime Reducing Component 1                                                     | chr1       | 0.20        | 0.036   |
| <i>CEP70</i>    | Centrosomal Protein 70kda                                                                        | chr3       | 0.21        | 0.042   |
| <i>CA2</i>      | Carbonic Anhydrase Ii                                                                            | chr8       | 0.22        | 0.018   |
| <i>SGTA</i>     | Small Glutamine-Rich Tetratricopeptide Repeat (Tpr)-Containing, Alpha                            | chr19      | 0.24        | 0.045   |
| <i>BCAP29</i>   | B-Cell Receptor-Associated Protein 29                                                            | chr7       | 0.24        | 0.023   |
| <i>SDHAF3</i>   | Succinate Dehydrogenase Complex Assembly Factor 3                                                | chr7       | 0.25        | 0.008   |
| <i>IKBKAP</i>   | Inhibitor Of Kappa Light Polypeptide Gene Enhancer In B-Cells, Kinase Complex-Associated Protein | chr9       | 0.26        | 0.025   |
| <i>CR1</i>      | Complement Component (3b/4b) Receptor 1                                                          | chr1       | 0.30        | 0.041   |
| <i>DTD1</i>     | D-Tyrosyl-Trna Deacylase 1                                                                       | chr20      | 0.30        | 0.038   |

|                                     |                                                        |       |      |       |
|-------------------------------------|--------------------------------------------------------|-------|------|-------|
| <i>FANCG</i>                        | Fanconi Anemia Complementation Group G                 | chr9  | 0.30 | 0.001 |
| <i>HIST2H4A;</i><br><i>HIST2H4B</i> | Histone Cluster 2, H4a; Histone Cluster 2, H4b         | chr1  | 0.30 | 0.011 |
| <i>PELP1</i>                        | Proline, Glutamate And Leucine Rich Protein 1          | chr17 | 0.31 | 0.021 |
| <i>NCK2</i>                         | Nck Adaptor Protein 2                                  | chr2  | 0.32 | 0.038 |
| <i>HIST2H4B;</i><br><i>HIST2H4A</i> | Histone Cluster 2, H4b; Histone Cluster 2, H4a         | chr1  | 0.32 | 0.025 |
| <i>MRPL14</i>                       | Mitochondrial Ribosomal Protein L14                    | chr6  | 0.33 | 0.045 |
| <i>COLGALT1</i>                     | Collagen Beta(1-O)Galactosyltransferase 1              | chr19 | 0.33 | 0.032 |
| <i>HELLS</i>                        | Helicase, Lymphoid-Specific                            | chr10 | 0.33 | 0.047 |
| <i>TNSF13B</i>                      | Tumor Necrosis Factor (ligand) Superfamily, Member 13B | chr13 | 0.33 | 0.048 |

**Table S7.** Top 20 upregulated (red) and downregulated (blue) genes in MV-4-11 cells treated with Nut3a+WIP1i vs. Nut-3a

| Gene            | Description                                                                 | Chromosome | Fold change | p value |
|-----------------|-----------------------------------------------------------------------------|------------|-------------|---------|
| <i>MDM2</i>     | MDM2 Proto-Oncogene, E3 Ubiquitin Protein Ligase                            | chr12      | 6.77        | 0.005   |
| <i>MMP16</i>    | Matrix Metallopeptidase 16 (Membrane-Inserted)                              | chr8       | 3.27        | 0.042   |
| <i>SETBP1</i>   | SET Binding Protein 1                                                       | chr18      | 2.91        | 0.023   |
| <i>ZMAT3</i>    | Zinc Finger, Matrin-Type 3                                                  | chr3       | 2.69        | 0.002   |
| <i>ZBTB33</i>   | Zinc Finger And BTB Domain Containing 33                                    | chrX       | 2.60        | 0.017   |
| <i>TMEM229B</i> | Transmembrane Protein 229B                                                  | chr14      | 2.39        | 0.001   |
| <i>TIGAR</i>    | TP53 Induced Glycolysis Regulatory Phosphatase                              | chr12      | 2.33        | 0.049   |
| <i>COL2A1</i>   | Collagen, Type II, Alpha 1                                                  | chr12      | 2.30        | ≤0.001  |
| <i>GPA33</i>    | Glycoprotein A33 (Transmembrane)                                            | chr1       | 2.27        | 0.001   |
| <i>VSIG10</i>   | V-Set And Immunoglobulin Domain Containing 10                               | chr12      | 2.27        | 0.014   |
| <i>ZFP90</i>    | ZFP90 Zinc Finger Protein                                                   | chr16      | 2.25        | 0.044   |
| <i>HERC6</i>    | HECT And RLD Domain Containing E3 Ubiquitin Protein Ligase Family Member 6  | chr4       | 2.23        | 0.021   |
| <i>ZNF91</i>    | Zinc Finger Protein 91                                                      | chr19      | 2.23        | 0.006   |
| <i>CCDC188</i>  | Coiled-Coil Domain Containing 188                                           | chr22      | 2.20        | 0.043   |
| <i>ZNF260</i>   | Zinc Finger Protein 260                                                     | chr2       | 2.17        | 0.013   |
| <i>FAM19A2</i>  | Family With Sequence Similarity 19 (Chemokine (C-C Motif)-Like), Member A2  | chr17      | 2.14        | 0.004   |
| <i>HMX2</i>     | H6 Family Homeobox 2                                                        | chr15      | 2.14        | 0.017   |
| <i>ISG20</i>    | Interferon Stimulated Exonuclease Gene 20kda                                | chr19      | 2.14        | 0.028   |
| <i>ZNF404</i>   | Zinc Finger Protein 404                                                     | chr12      | 2.14        | 0.002   |
| <i>YPEL1</i>    | Yippee Like 1                                                               | chr10      | 2.13        | 0.011   |
| <i>FOXM1</i>    | Forkhead Box M1                                                             | chr4       | 0.33        | 0.043   |
| <i>YWHAH</i>    | Tyrosine 3-Monooxygenase/Tryptophan 5-Monooxygenase Activation Protein, Eta | chr16      | 0.34        | 0.021   |
| <i>VAT1</i>     | Vesicle Amine Transport 1                                                   | chr1       | 0.36        | 0.041   |
| <i>AARS</i>     | Alanyl-Trna Synthetase                                                      | chr5       | 0.36        | 0.023   |
| <i>RARA</i>     | Retinoic Acid Receptor, Alpha                                               | chr1       | 0.38        | 0.024   |
| <i>ORC1</i>     | Origin Recognition Complex Subunit 1                                        | chr19      | 0.38        | 0.008   |
| <i>RNF145</i>   | Ring Finger Protein 145                                                     | chr12      | 0.39        | 0.043   |
| <i>RNF41</i>    | Ring Finger Protein 41, E3 Ubiquitin Protein Ligase                         | chr16      | 0.40        | 0.012   |
| <i>MCM6</i>     | Minichromosome Maintenance Complex Component 6                              | chr17      | 0.40        | 0.016   |

|                |                                                                        |       |      |       |
|----------------|------------------------------------------------------------------------|-------|------|-------|
| <i>SPTBN1</i>  | Spectrin, Beta, Non-Erythrocytic 1                                     | chr11 | 0.40 | 0.025 |
| <i>DNAAF1</i>  | Dynein, Axonemal, Assembly Factor 1                                    | chr1  | 0.40 | 0.034 |
| <i>E2F8</i>    | E2F Transcription Factor 8                                             | chr12 | 0.41 | 0.047 |
| <i>RNASE2</i>  | Ribonuclease, Rnase A Family, 2 (Liver, Eosinophil-Derived Neurotoxin) | chr17 | 0.43 | 0.022 |
| <i>SEN3</i>    | SUMO1/Sentrin/SMT3 Specific Peptidase 3                                | chr11 | 0.43 | 0.050 |
| <i>SMG6</i>    | SMG6 Nonsense Mediated Mrna Decay Factor                               | chr21 | 0.43 | 0.038 |
| <i>CDCA5</i>   | Cell Division Cycle Associated 5                                       | chr8  | 0.44 | 0.028 |
| <i>CHAF1B</i>  | Chromatin Assembly Factor 1, Subunit B (P60)                           | chr9  | 0.44 | 0.029 |
| <i>CHRNE</i>   | Cholinergic Receptor, Nicotinic Epsilon                                | chr3  | 0.44 | 0.021 |
| <i>PLD1</i>    | Phospholipase D1, Phosphatidylcholine-Specific                         | chr15 | 0.44 | 0.037 |
| <i>USP17L2</i> | Ubiquitin Specific Peptidase 17-Like Family Member 2                   | chr11 | 0.44 | 0.035 |

**Table S8.** Top 20 upregulated (red) and downregulated (blue) genes in NOMO-1 cells treated with Nut3a+WIP1i vs. Nut-3a

| Gene                                | Description                                                            | Chromosome | Fold change | p value |
|-------------------------------------|------------------------------------------------------------------------|------------|-------------|---------|
| <i>FABP4</i>                        | Fatty Acid Binding Protein 4, Adipocyte                                | chr8       | 38.59       | 0.004   |
| <i>CALCOCO1</i>                     | Calcium Binding And Coiled-Coil Domain 1                               | chr12      | 4.82        | 0.015   |
| <i>ZNF518B</i>                      | Zinc Finger Protein 518B                                               | chr4       | 4.53        | 0.019   |
| <i>PHGDH</i>                        | Phosphoglycerate Dehydrogenase                                         | chr1       | 4.47        | 0.050   |
| <i>LY6G6C</i>                       | Lymphocyte Antigen 6 Complex, Locus G6C                                | chr6       | 4.06        | 0.050   |
| <i>ME1</i>                          | Malic Enzyme 1, NADP(+)-Dependent, Cytosolic                           | chr6       | 3.61        | 0.024   |
| <i>ANXA5</i>                        | Annexin A5                                                             | chr4       | 3.12        | 0.042   |
| <i>FAM219A</i>                      | Family With Sequence Similarity 219, Member A                          | chr9       | 3.05        | 0.013   |
| <i>KCNAB1</i>                       | Potassium Channel, Voltage Gated Subfamily A Regulatory Beta Subunit 1 | chr3       | 3.03        | 0.036   |
| <i>IL23R</i>                        | Interleukin 23 Receptor                                                | chr1       | 2.95        | 0.042   |
| <i>STAC2</i>                        | SH3 And Cysteine Rich Domain 2                                         | chr17      | 2.83        | 0.019   |
| <i>C17orf99</i>                     | Chromosome 17 Open Reading Frame 99                                    | chr17      | 2.71        | 0.049   |
| <i>SMG5</i>                         | SMG5 Nonsense Mediated Mrna Decay Factor                               | chr1       | 2.69        | 0.024   |
| <i>HEATR4</i>                       | HEAT Repeat Containing 4                                               | chr14      | 2.69        | 0.046   |
| <i>KMO</i>                          | Kynurenine 3-Monooxygenase (Kynurenine 3-Hydroxylase)                  | chr1       | 2.68        | 0.043   |
| <i>UGT2B10</i>                      | UDP Glucuronosyltransferase 2 Family, Polypeptide B10                  | chr4       | 2.68        | 0.034   |
| <i>TNFRSF9</i>                      | Tumor Necrosis Factor Receptor Superfamily, Member 9                   | chr1       | 2.62        | 0.028   |
| <i>TNFSF4</i>                       | Tumor Necrosis Factor (Ligand) Superfamily, Member 4                   | chr1       | 2.53        | 0.001   |
| <i>IGDCC3</i>                       | Immunoglobulin Superfamily, DCC Subclass, Member 3                     | chr15      | 2.53        | 0.049   |
| <i>PRMT8</i>                        | Protein Arginine Methyltransferase 8                                   | chr12      | 2.51        | 0.017   |
| <i>PPP1R27</i>                      | Protein Phosphatase 1, Regulatory Subunit 27                           | chr17      | 0.08        | 0.048   |
| <i>HIST2H4B;</i><br><i>HIST2H4A</i> | Histone Cluster 2, H4b; Histone Cluster 2, H4a                         | chr1       | 0.08        | 0.033   |
| <i>CTSG</i>                         | Cathepsin G                                                            | chr14      | 0.09        | 0.016   |
| <i>IL18RAP</i>                      | Interleukin 18 Receptor Accessory Protein                              | chr2       | 0.12        | 0.016   |
| <i>HIST1H3B</i>                     | Histone Cluster 1, H3b                                                 | chr6       | 0.15        | 0.048   |
| <i>SPP1</i>                         | Secreted Phosphoprotein 1                                              | chr4       | 0.16        | 0.042   |
| <i>HIST1H2AK</i>                    | Histone Cluster 1, H2ak                                                | chr6       | 0.17        | 0.012   |
| <i>PDAP1</i>                        | PDGFA Associated Protein 1                                             | chr7       | 0.17        | 0.045   |
| <i>HIST1H2BI</i>                    | Histone Cluster 1, H2bi                                                | chr6       | 0.18        | 0.041   |

|                  |                                                                               |       |      |       |
|------------------|-------------------------------------------------------------------------------|-------|------|-------|
| <i>HIST2H3A</i>  | Histone Cluster 2, H3a                                                        | chr1  | 0.18 | 0.012 |
| <i>ATP5I</i>     | ATP Synthase, H <sup>+</sup> Transporting, Mitochondrial Fo Complex Subunit E | chr4  | 0.20 | 0.036 |
| <i>SLC6A8</i>    | Solute Carrier Family 6, Member 8                                             | chrX  | 0.21 | 0.018 |
| <i>CLEC11A</i>   | C-Type Lectin Domain Family 11, Member A                                      | chr19 | 0.21 | 0.018 |
| <i>RPS27A</i>    | Ribosomal Protein S27a                                                        | chr2  | 0.21 | 0.043 |
| <i>CCR2</i>      | Chemokine (C-C Motif) Receptor 2                                              | chr3  | 0.21 | 0.016 |
| <i>INPP5K</i>    | Inositol Polyphosphate-5-Phosphatase K                                        | chr17 | 0.22 | 0.046 |
| <i>PSMD8</i>     | Proteasome 26S Subunit, Non-AtPase 8                                          | chr19 | 0.22 | 0.036 |
| <i>ART3</i>      | ADP-Ribosyltransferase 3                                                      | chr4  | 0.23 | 0.011 |
| <i>HIST1H2AE</i> | Histone Cluster 1, H2ae                                                       | chr6  | 0.23 | 0.048 |
| <i>DEPDC1</i>    | DEP Domain Containing 1                                                       | chr1  | 0.24 | 0.049 |

**Table S9.** P53 target\* and signature\*\* genes that are significantly upregulated in MV-4-11 or NOMO-1 cells treated with Nut-3a+WIP1i *vs.* control.

| Gene            | Description                                                         | Chromosome | Fold change | p value | Cell line |
|-----------------|---------------------------------------------------------------------|------------|-------------|---------|-----------|
| <i>MDM2</i>     | MDM2 proto-oncogene, E3 ubiquitin protein ligase                    | chr12      | 40.50       | 0.002   | MV-4-11   |
| <i>CDKN1A</i>   | cyclin-dependent kinase inhibitor 1A (p21, Cip1)                    | chr6       | 12.73       | 0.012   | MV-4-11   |
| <i>TP53INP1</i> | tumor protein p53 inducible nuclear protein 1                       | chr8       | 12.73       | 0.006   | MV-4-11   |
| <i>EDA2R</i>    | ectodysplasin A2 receptor                                           | chrX       | 11.47       | 0.021   | MV-4-11   |
| <i>TIGAR</i>    | TP53 induced glycolysis regulatory phosphatase                      | chr12      | 10.78       | 0.001   | MV-4-11   |
| <i>TRIM22</i>   | UTR5 best transcript NM_001199573                                   | chr11      | 10.48       | 0.004   | MV-4-11   |
| <i>XPC</i>      | xeroderma pigmentosum, complementation group C                      | chr3       | 9.85        | 0.006   | MV-4-11   |
| <i>APOBEC3H</i> | apolipoprotein B mRNA editing enzyme, catalytic polypeptide-like 3H | chr22      | 7.94        | 0.038   | MV-4-11   |
| <i>SESN1</i>    | sestrin 1                                                           | chr6       | 6.96        | 0.000   | MV-4-11   |
| <i>ZMAT3</i>    | zinc finger, matrin-type 3                                          | chr3       | 6.87        | 0.001   | MV-4-11   |
| <i>POLH</i>     | polymerase (DNA directed), eta                                      | chr6       | 5.82        | 0.025   | MV-4-11   |
| <i>FDXR</i>     | ferredoxin reductase                                                | chr17      | 5.06        | 0.006   | MV-4-11   |
| <i>MLF2</i>     | myeloid leukemia factor 2                                           | chr12      | 4.79        | 0.000   | MV-4-11   |
| <i>PLK2</i>     | polo-like kinase 2                                                  | chr5       | 4.23        | 0.003   | MV-4-11   |
| <i>FBXO22</i>   | F-box protein 22                                                    | chr15      | 4.11        | 0.031   | MV-4-11   |
| <i>CYFIP2</i>   | cytoplasmic FMR1 interacting protein 2                              | chr5       | 3.92        | 0.034   | MV-4-11   |
| <i>ANXA4</i>    | intronic best transcript NM_0011153                                 | chr2       | 3.53        | 0.032   | MV-4-11   |
| <i>DCP1B</i>    | decapping mRNA 1B                                                   | chr12      | 3.16        | 0.038   | MV-4-11   |
| <i>LAPTM5</i>   | lysosomal protein transmembrane 5                                   | chr1       | 3.12        | 0.046   | MV-4-11   |
| <i>DDB2</i>     | damage-specific DNA binding protein 2                               | chr11      | 2.97        | 0.024   | MV-4-11   |
| <i>RETSAT</i>   | retinol saturase (all-trans-retinol 13,14-reductase)                | chr2       | 2.83        | 0.039   | MV-4-11   |
| <i>TNFSF9</i>   | tumor necrosis factor (ligand) superfamily, member 9                | chr19      | 2.83        | 0.003   | MV-4-11   |



|                  |                                                                                               |       |       |       |         |
|------------------|-----------------------------------------------------------------------------------------------|-------|-------|-------|---------|
| <i>MRPL49</i>    | mitochondrial ribosomal protein L49                                                           | chr11 | 2.79  | 0.017 | MV-4-11 |
| <i>DOCK8</i>     | dedicator of cytokinesis 8                                                                    | chr9  | 2.77  | 0.037 | MV-4-11 |
| <i>TNFRSF10C</i> | tumor necrosis factor receptor superfamily, member 10c, decoy without an intracellular domain | chr8  | 2.55  | 0.002 | MV-4-11 |
| <i>FBXO32</i>    | F-box protein 32                                                                              | chr8  | 2.36  | 0.036 | MV-4-11 |
| <i>ISCU</i>      | iron-sulfur cluster assembly enzyme                                                           | chr12 | 2.36  | 0.011 | MV-4-11 |
| <i>MR1</i>       | major histocompatibility complex, class I-related                                             | chr1  | 2.25  | 0.012 | MV-4-11 |
| <i>IER5</i>      | immediate early response 5                                                                    | chr1  | 2.17  | 0.013 | MV-4-11 |
| <i>ZNF195</i>    | zinc finger protein 195                                                                       | chr11 | 2.13  | 0.021 | MV-4-11 |
| <i>BTBD10</i>    | BTB (POZ) domain containing 10                                                                | chr11 | 2.10  | 0.021 | MV-4-11 |
| <i>HHAT</i>      | hedgehog acyltransferase                                                                      |       | 2.07  | 0.010 | MV-4-11 |
| <i>GADD45A</i>   | growth arrest and DNA-damage-inducible, alpha                                                 | chr1  | 2.06  | 0.013 | MV-4-11 |
| <i>NINJ1</i>     | ninjurin 1                                                                                    | chr9  | 2.17  | 0.012 | NOMO-1  |
| <i>LACCI1</i>    | laccase (multicopper oxidoreductase) domain containing 1                                      | chr13 | 20.39 | 0.015 | NOMO-1  |
| <i>VWCE</i>      | von Willebrand factor C and EGF domains                                                       | chr11 | 2.10  | 0.007 | NOMO-1  |

\* p53 targets from Fischer M, *Oncogene* 2017.

\*\* genes from the "Hallmark p53 pathway" MSigDB signature.

### Supplementary Figures

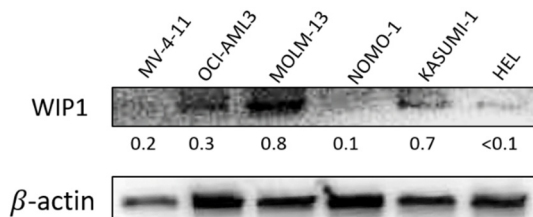

**Figure S1. WIP1 protein expression in AML cell lines.** Representative western blot of WIP1 expression in *TP53*-wt (MV-4-11, OCI-AML3, MOLM-13) and *TP53*-mut (NOMO-1, KASUMI-1, HEL) cell lines. Values indicate WIP1 expression normalized on  $\beta$ -actin.

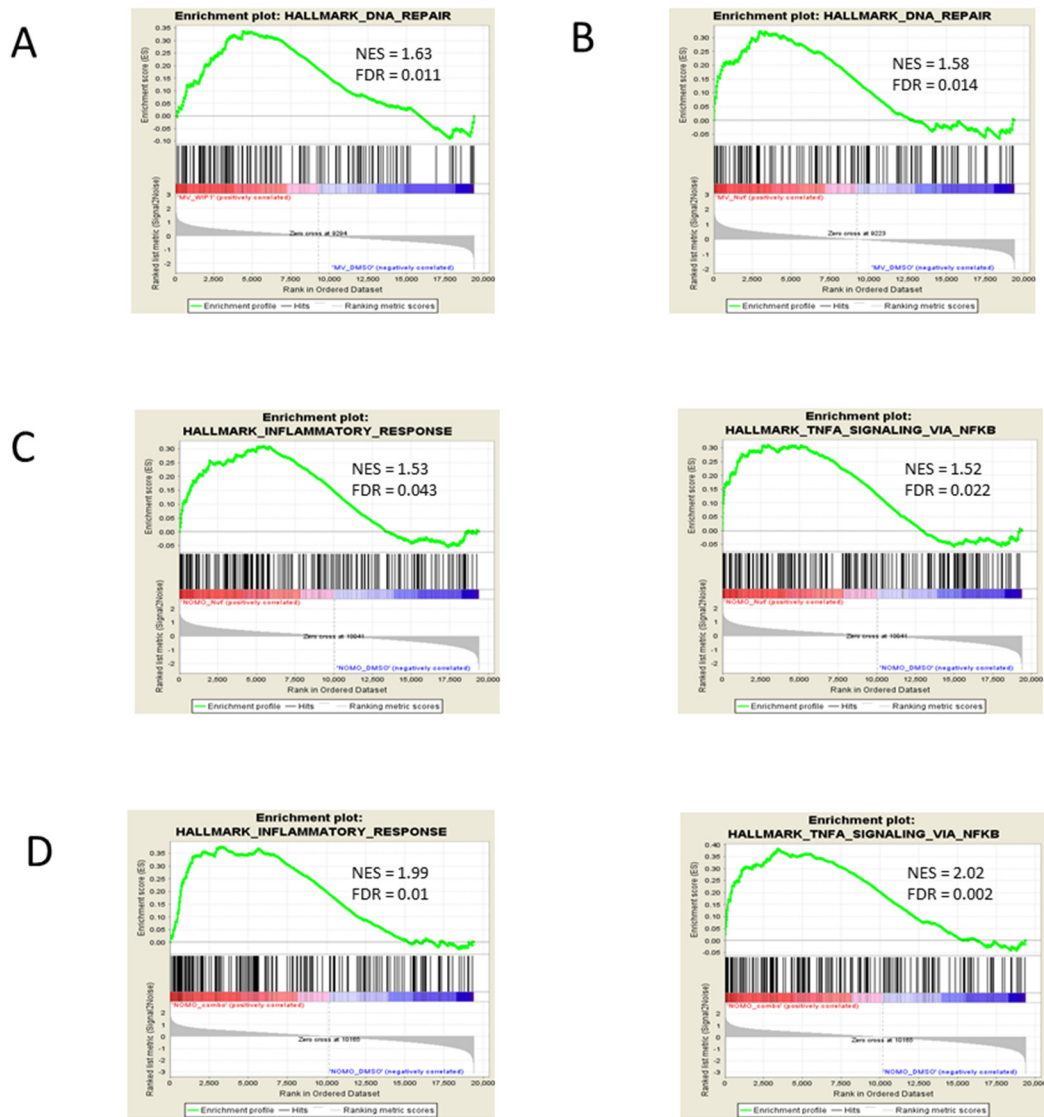

**Figure S2. Additional transcriptional signatures in single and combined-treatment enriched in MV-4-11 and NOMO-1 cells.** GSEA plots of MV-4-11 cells treated with (A) WIP1i *vs.* DMSO, (B) Nut-3a *vs.* DMSO. GSEA common plots of NOMO-1 cells treated with (C) Nut-3a *vs.* DMSO, (D) Nut-3a+WIP1i *vs.* DMSO.

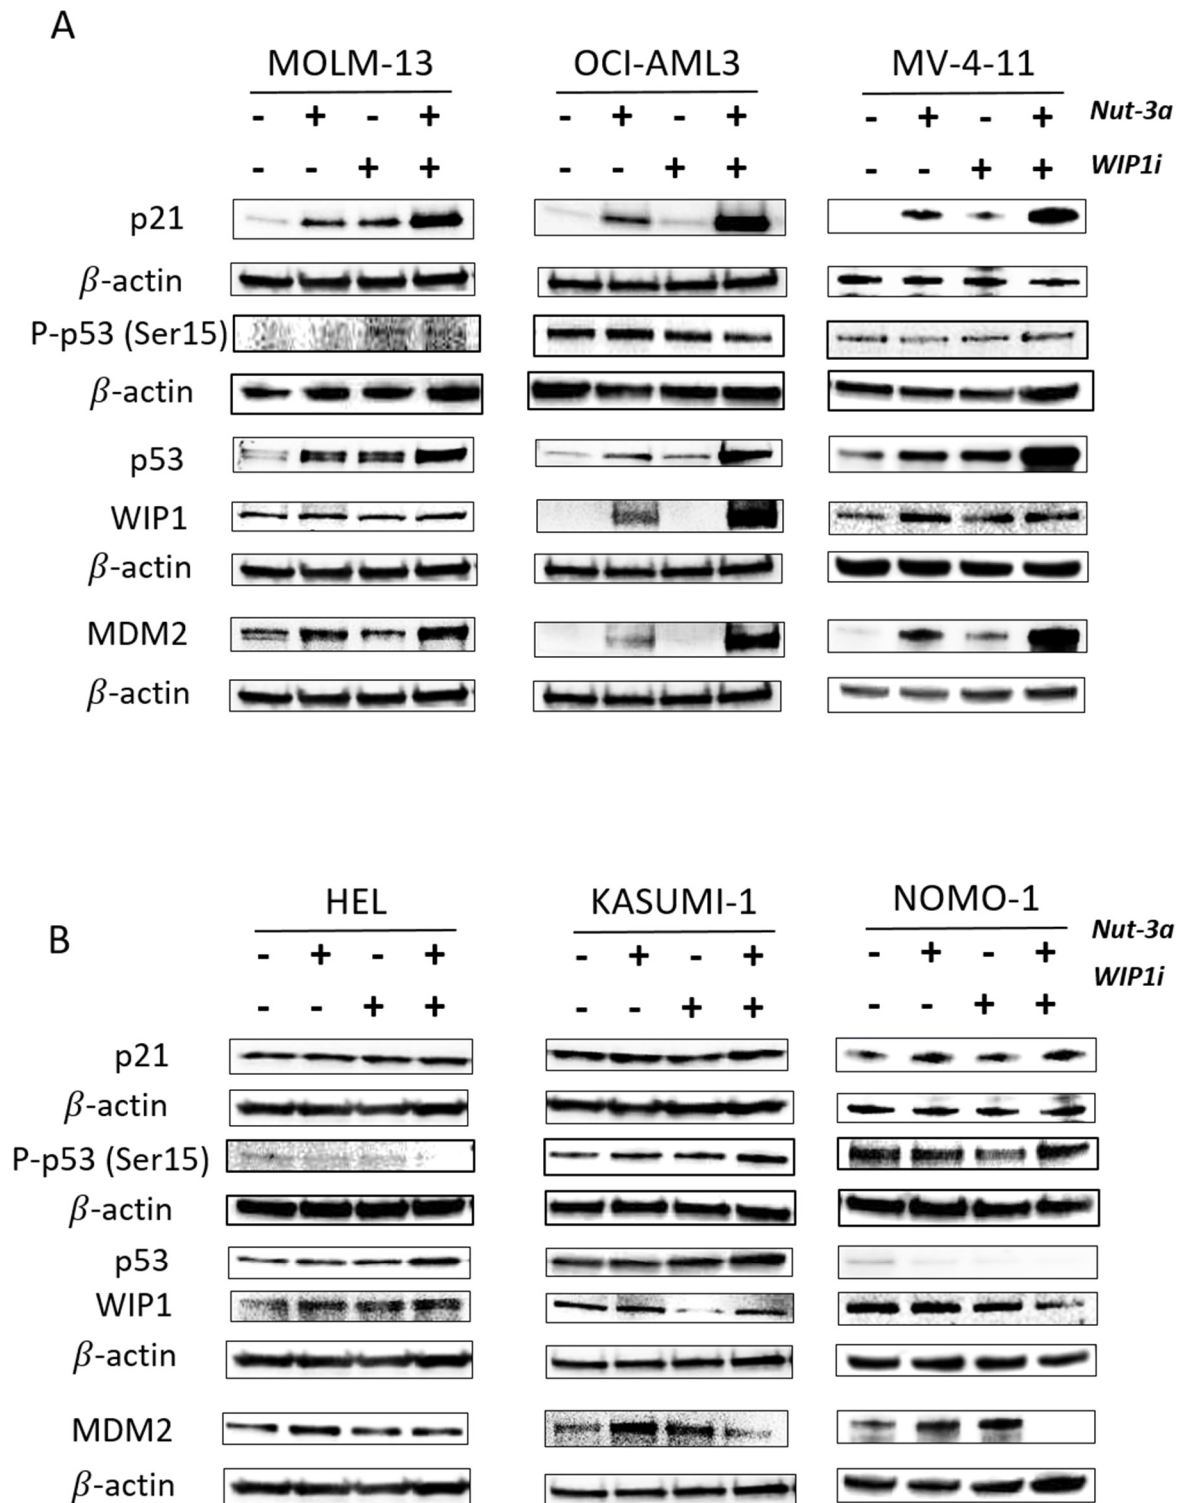

**Figure S3. Expression changes of p53 and its related genes induced by the treatment in *TP53*-wt and *TP53*-mut cells.** Representative western blots of p53-related genes in (A) MOLM-13, OCI-AML3 and MV-4-11 and (B) HEL, KASUMI-1 and NOMO-1 cells after 16h of treatment (*Nut-3a* 0.5, 2.5 and 0.5  $\mu$ M; *WIP1i* 10, 20, 5  $\mu$ M respectively for *TP53*-wt cells; *Nut-3a* 5  $\mu$ M and *WIP1i* 20  $\mu$ M for all the *TP53*-mut cells).
